# Supplementary figures and images for: A quantum biochemistry investigation of the protein–protein interactions for the description of allosteric modulation on biomass-degrading chimera
Source: Royal Society of Chemistry journal article supplement (doi:10.1039/d0cp04415f), 2020-01-01

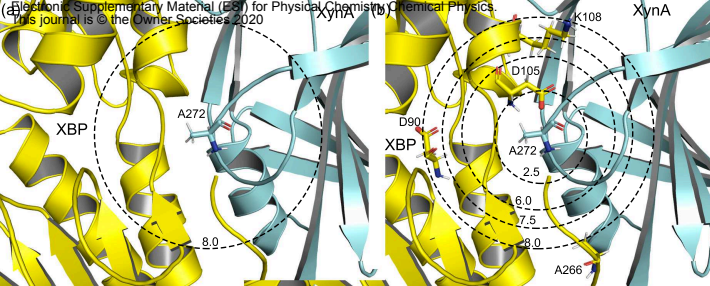

Supplement: d0cp04415f3.pdf [file d0cp04415f3.pdf]

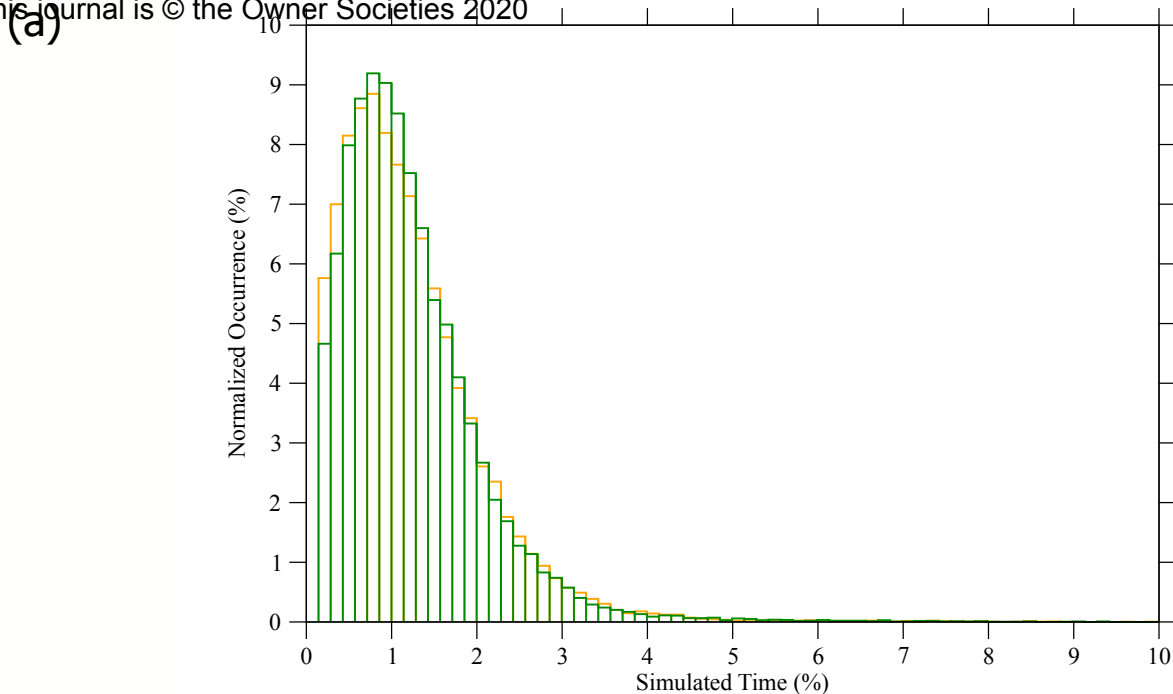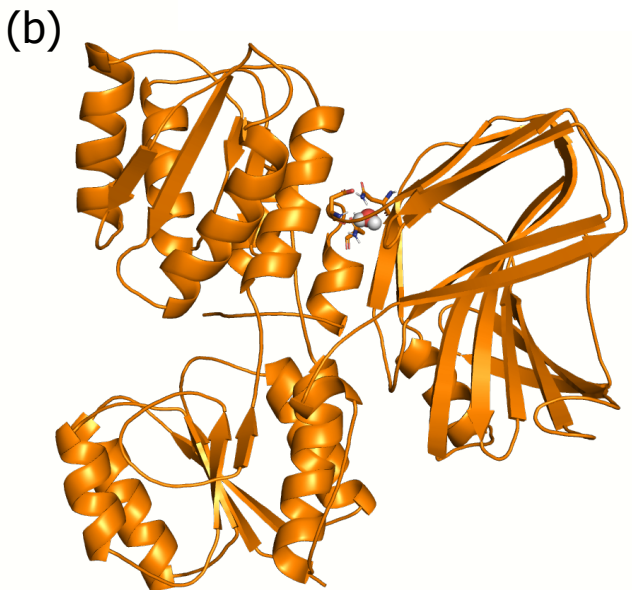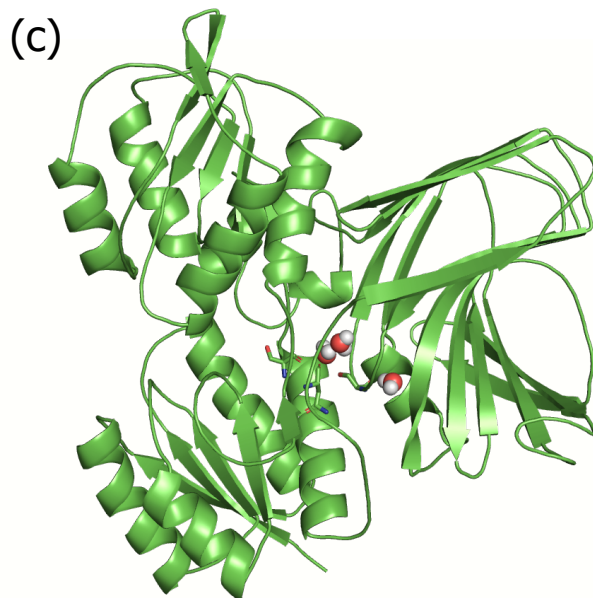

Supplement: d0cp04415f5.pdf [file d0cp04415f5.pdf]

(a)

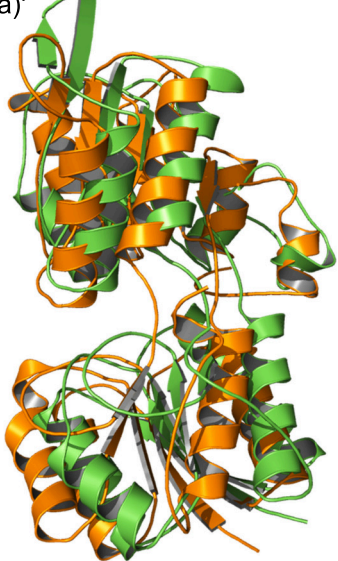

 Xylbound  
 Xylfree

(b)

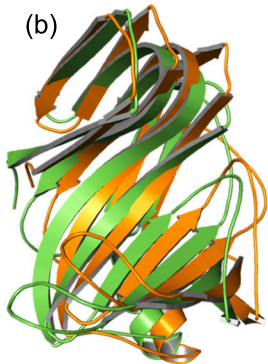

Supplement: d0cp04415f6.pdf [file d0cp04415f6.pdf]

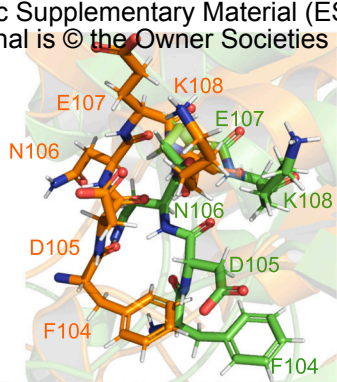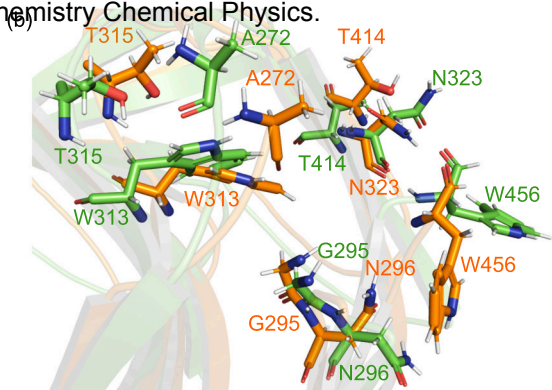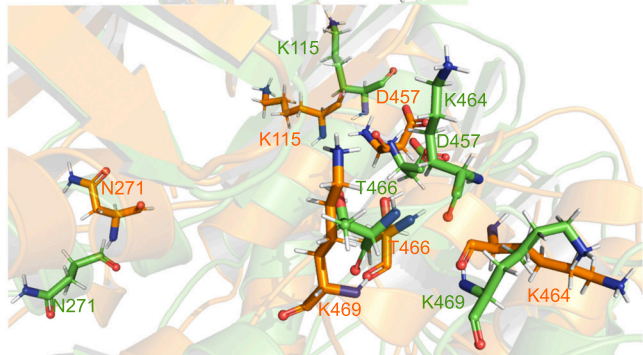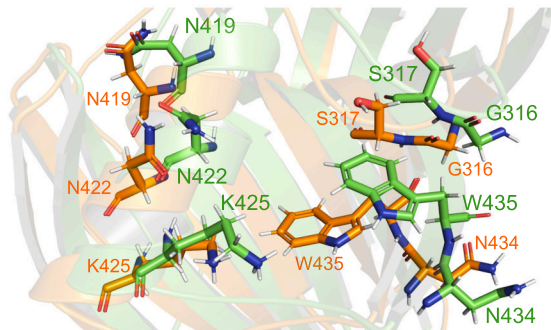

Supplement: d0cp04415f7.pdf [file d0cp04415f7.pdf]
